# Supplementary material for: Lifelong Ulk1-Mediated Autophagy Deficiency in Muscle Induces Mitochondrial Dysfunction and Contractile Weakness
Source: MDPI journal article supplement (doi:10.3390/ijms22041937), 2021-02-16
Supplement: s1 [file s1]

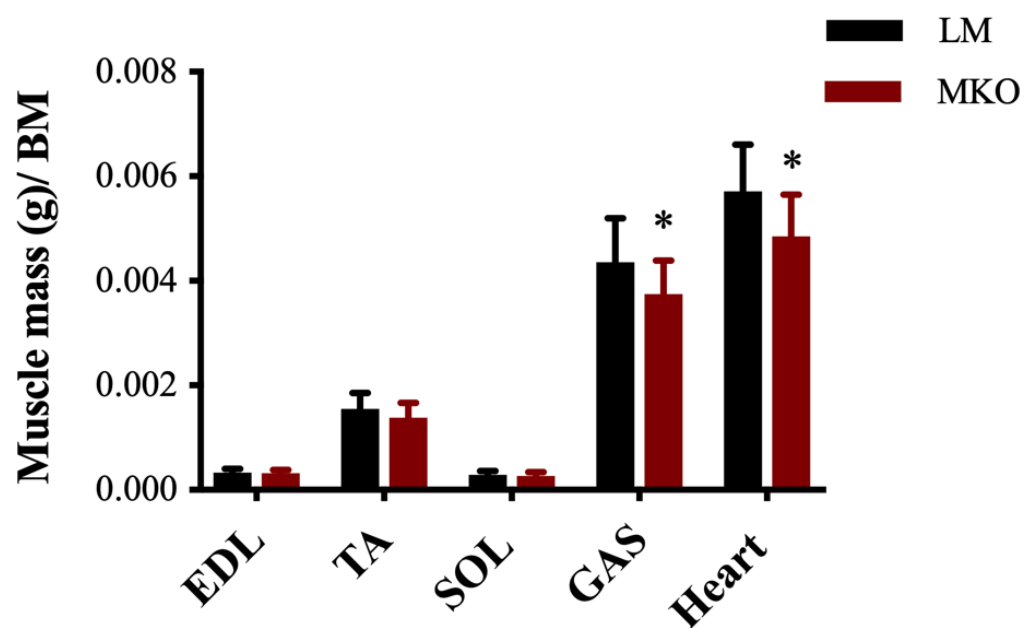

**Supplemental Fig 1: Muscle masses in old MKO and LM mice.** Muscle masses normalized to body mass. All data are presented as mean  $\pm$  SD n=10 mice. \*= significantly different from LM.

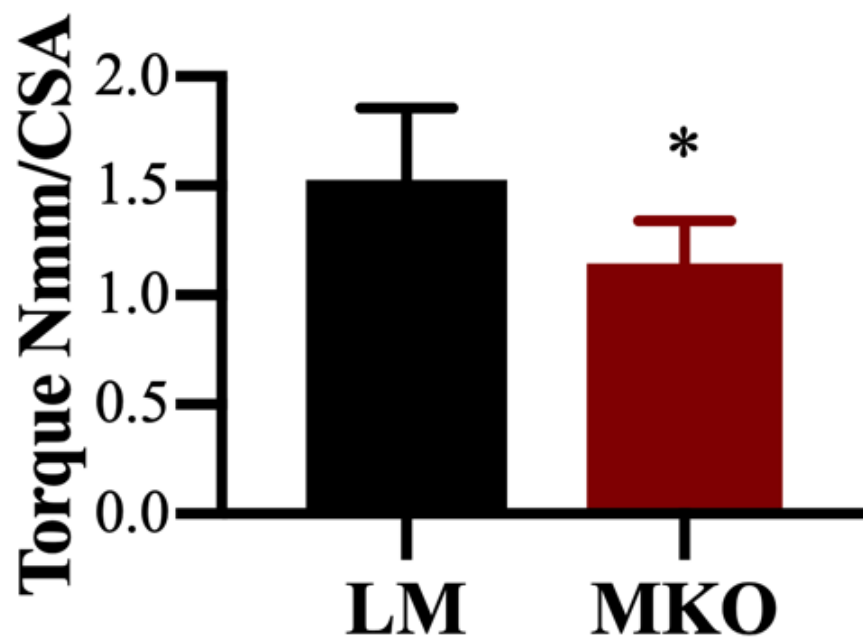

**Supplemental Fig 2: *In vivo* torque normalized by CSA.** *In vivo* torque normalized to CSA to account for fiber size differences between genotypes. All data are presented as mean ± SD n=10 mice. \*= significantly different from LM.
