# Supplementary material for: Lifelong Ulk1-Mediated Autophagy Deficiency in Muscle Induces Mitochondrial Dysfunction and Contractile Weakness
Source: MDPI journal article supplement (doi:10.3390/ijms22041937), 2021-02-16
Supplement: s1 [file s1]

**Supplemental Table 1: *in vivo* contractile properties**

|              | LM<br>(n=10)<br>12 Mo | LM<br>(n=10)<br>24 Mo | MKO<br>(n=10)<br>12 Mo | MKO<br>(n=10)<br>24 Mo | P-value |
|--------------|-----------------------|-----------------------|------------------------|------------------------|---------|
| TTP (ms)     | 58.8 (26.7)           | 71.1 (11.7)           | 71.1 (26.2)            | 82.8 (17.4)            | 0.960   |
| HRT (ms)     | 47.1 (6.7)            | 47.7 (7.6)            | 48.1 (9.4)             | 46.9 (6.8)             | 0.489   |
| +dP/dt (N/s) | 330.5 (45.5)          | 291.6 (52.6)          | 288.9 (61.8)           | 285.7 (107.3)          | 0.523   |
| -dP/dt (N/s) | 288.0 (56.0)          | 277.4 (76.0)          | 271.9 (66.2)           | 244.3 (73.2)           | 0.667   |

Mean (SD) TTP=time-to-peak force. HRT=half-relaxation time. dP/dt=maximal rate of contraction. -dP/dt=maximal rate of relaxation

**Supplemental Table 2: *in vitro* contractile properties**

|                             | LM<br>(n=10) | MKO<br>(n=10) | P-value |
|-----------------------------|--------------|---------------|---------|
| <b><i>EDL</i></b>           |              |               |         |
| Length (mm)                 | 11.7 (0.5)   | 11.4 (0.4)    | 0.117   |
| Mass (mg)                   | 10.6 (1.2)   | 10.5 (1.8)    | 0.892   |
| CSA                         | 1.95 (0.27)  | 1.98 (0.35)   | 0.796   |
| P <sub>t</sub> (nM)         | 84.6 (14.6)  | 63.6 (14.8)   | 0.041   |
| P <sub>t</sub> TTP (ms)     | 20.4 (2.6)   | 18.5 (2.6)    | 0.166   |
| P <sub>t</sub> HRT (ms)     | 23.2 (3.1)   | 19.7 (3.9)    | 0.068   |
| P <sub>o</sub> +dP/dt (N/s) | 14.5 (3.2)   | 13.2 (3.2)    | 0.453   |
| P <sub>o</sub> -dP/dt (N/s) | 27.0 (5.1)   | 23.6 (7.5)    | 0.300   |
| <b><i>Soleus</i></b>        |              |               |         |
| Length (mm)                 | 10.1 (1.0)   | 10.1 (1.1)    | 0.995   |
| Mass (mg)                   | 9.0 (1.9)    | 10.0 (2.5)    | 0.442   |
| CSA                         | 1.21 (0.31)  | 1.33 (0.42)   | 0.511   |
| P <sub>t</sub> (nM)         | 20.8 (3.1)   | 17.1 (5.6)    | 0.475   |
| P <sub>t</sub> TTP (ms)     | 41.6 (10.9)  | 35.3 (9.6)    | 0.531   |
| P <sub>t</sub> HRT (ms)     | 61.5 (14.2)  | 47.8 (11.7)   | 0.277   |
| P <sub>o</sub> +dP/dt (N/s) | 6.4 (1.6)    | 6.4 (2.5)     | 0.947   |
| P <sub>o</sub> -dP/dt (N/s) | 5.3 (2.0)    | 6.9 (1.5)     | 0.405   |

Mean (SD). P<sub>t</sub>=peak twitch force. TTP=time to-peak force.  
HRT=half-relaxation time. P<sub>o</sub>=maximal isometric tetanic force.  
+dP/dt=maximal rate of contraction. -dP/dt=maximal rate of relaxation
