# Supplementary material for: Lifelong Ulk1-Mediated Autophagy Deficiency in Muscle Induces Mitochondrial Dysfunction and Contractile Weakness
Source: Int J Mol Sci. 2021 Feb 16;22(4):1937. doi: 10.3390/ijms22041937 (PMC7919824; doi:10.3390/ijms22041937)
Supplement: Supplementary file 1 [file ijms-22-01937-s001.zip]

Archive with 4 entries (4 files):
- LM Autophagy Flux.avi
- MKO Autophagy Flux.avi
- Supplemental Tables 1 and 2.pdf
- supplementary figures.pdf
